# Supplementary material
Source: publisher figshare collection journal article supplement (https://acs.figshare.com/ndownloader/files/4230466)
Supplement: Supplementary file 1 [file 4230466]

# Supporting Information

## Unravelling the conformational plasticity of the extracellular domain of a prokaryotic nAChR homologue in solution by NMR

*Christos T. Chasapis<sup>a</sup>, Aikaterini I. Argyriou<sup>a</sup>, Pierre-Jean Corringer<sup>b</sup>, Detlef Bentrop<sup>c</sup>  
and Georgios A. Spyroulias<sup>a\*</sup>*

<sup>a</sup> *Department of Pharmacy, University of Patras, GR-26504, Patras, Greece.*

<sup>b</sup> *Institut Pasteur, Groupe Récepteurs-Canaux, F-75015 Paris, France*

<sup>c</sup> *Institute of Physiology II, University of Freiburg, D-79104 Freiburg, Germany.*

- *To whom correspondence should be addressed. Phone: (+30) 2610-969950, 951. Fax: (+30) 2610-969950. E-mail: [G.A.Spyroulias@upatras.gr](mailto:G.A.Spyroulias@upatras.gr)*

## Materials and Methods

### Sample preparation:

The GLIC<sub>ECD</sub> construct (1) was expressed in *Escherichia coli* and purified using affinity chromatography via a C-terminal His6 tag. The U-<sup>2</sup>H/<sup>15</sup>N/<sup>13</sup>C labeled sample for NMR studies was prepared using minimal (M9) medium supplemented with 0.1 g/l (<sup>15</sup>N, <sup>13</sup>C, <sup>2</sup>H) ISOGRO® (Sigma), 1 g/l <sup>15</sup>NH<sub>4</sub>(SO<sub>4</sub>)<sub>2</sub> and 4 g/l of <sup>2</sup>H<sub>7</sub>/<sup>13</sup>C<sub>6</sub>-glucose as nitrogen and carbon sources, respectively, in 99.9% <sup>2</sup>H<sub>2</sub>O. Protein samples for NMR experiments were prepared in a mixed solvent of 90% H<sub>2</sub>O (50 mM KPi, pH 6.9) and 10% <sup>2</sup>H<sub>2</sub>O.

A brief overview of the selective labeling efforts is given in Table S1.

Selective unlabeled strategy in *E. coli* BL21(DE3): The amino acid selective unlabeled of <sup>15</sup>N-GLIC<sub>ECD</sub> with <sup>14</sup>N-Lys, <sup>14</sup>N-Arg, <sup>14</sup>N-His, and <sup>14</sup>N-Asn, respectively, was achieved by addition of 150 mg/l of each unlabeled amino acid (except 1 g of <sup>14</sup>N-Asn) to <sup>15</sup>N labeled minimal (M9) medium one hour prior to induction by IPTG.

Selective <sup>15</sup>N labeling strategy in *E. coli* BL21(DE3): The amino acid selectively <sup>15</sup>N labeled samples of GLIC<sub>ECD</sub> were expressed in otherwise unlabeled minimal (M9) medium. To incorporate <sup>15</sup>N labeled Lys, Leu, Val, or Ile into <sup>14</sup>N-GLIC<sub>ECD</sub>, 150 mg/l <sup>15</sup>N-Lys, 85 mg/l <sup>15</sup>N-Leu (with 510 mg/l each of unlabeled Val and Ile), 170 mg/l <sup>15</sup>N-Val (with 1g/l each of unlabeled Leu and Val) and 90 mg/l of <sup>15</sup>N-Ile (with 540 mg/l each of unlabeled Leu and Val), respectively, were added to the culture one hour prior to induction.

Selective <sup>15</sup>N labeling strategy using the auxotrophic *E. coli* strain DL39: All the amino acid selective <sup>15</sup>N labeling of GLIC<sub>ECD</sub> using *E. coli* DL39 was done on unlabeled minimal (M9) medium, supplemented with the following mixture of unlabeled amino acids: 150 mg/l Phe, 90 mg/l Tyr, 400 mg/l Asp, 200 mg/l Leu, 200 mg/l Ile, 200 mg/l Val, 400 mg/l Ala, 200 mg/l Asn, 500 mg/l Gly, 100 mg/l Met and 210 mg/l Lys. To incorporate <sup>15</sup>N labeled Leu, Phe, Ala, or Tyr into <sup>14</sup>N-GLIC<sub>ECD</sub>, the respective <sup>14</sup>N amino acid was omitted from the above mixture. Instead, 200 mg/l, 150 mg/l, 300 mg/l or 70 mg/l, respectively, of the desired <sup>15</sup>N amino acid were added to the medium at the beginning of the cell culture.

### NMR experiments:

The complete set of heteronuclear NMR experiments used for the sequence specific assignments of H<sup>N</sup>, N, Ca, Cb and C' is listed in Table S2. Internal 2,2-dimethyl-2-silapentane-5-sulfonate (DSS) was used as a chemical shift reference for <sup>1</sup>H. The backbone resonance assignments are available from the BioMagResBank (<http://www.bmrb.wisc.edu/>) under accession no. 17695.

The <sup>15</sup>N R1 and R2 relaxation rates (2) and {<sup>1</sup>H<sup>N</sup>}-<sup>15</sup>N NOE values (3) were measured at 600 MHz (298 K) on a Bruker Avance spectrometer equipped with a TXI CryoProbe™ [Figure S2].

### Molecular Dynamics Simulations and Normal Mode Analysis.

Both calculations were performed on the ECD of one subunit from the crystal structure of the pentameric full-length GLIC (PDB: 3EAM). Chain A with the minimal number of undefined residues was selected.

**Table S1:** Overview of the selective labelling efforts for the preparation of GLIC<sub>ECD</sub> samples for NMR studies.

| <b><sup>15</sup>N Selective labeling using prototrophic E. coli BL21(DE3):</b> |                                       |                          |            |
|--------------------------------------------------------------------------------|---------------------------------------|--------------------------|------------|
| Amino acid                                                                     | <sup>14</sup> N<br>(reverse labeling) | <sup>15</sup> N labeling | Scrambling |
| Leu                                                                            | ✓                                     |                          | +          |
| Arg                                                                            | ✓                                     |                          | -          |
| Val                                                                            | ✓                                     |                          | +          |
| Phe                                                                            | ✓                                     |                          | +          |
| Lys                                                                            | ✓                                     |                          | -          |
| Ala                                                                            | ✓                                     |                          | +          |
| Lys                                                                            |                                       | ✓                        | -          |
| Leu                                                                            |                                       | ✓                        | +          |
| <sup>15</sup> N Leu+ <sup>14</sup> N (Val+Ile)                                 |                                       | ✓                        | +          |
| <sup>15</sup> N Val + <sup>14</sup> N (Leu+Val)                                |                                       | ✓                        | -          |
| <sup>15</sup> N Ile + <sup>14</sup> N ( Leu+Val)                               |                                       | ✓                        | -          |
| His                                                                            | ✓                                     |                          | -          |
| Asn                                                                            | ✓                                     |                          | -          |
| <b><sup>15</sup>N selective labeling using auxotrophic E. coli DL39:</b>       |                                       |                          |            |
| Amino acid                                                                     | <sup>15</sup> N labeling              | Scrambling               |            |
| Leu                                                                            | ✓                                     | -                        |            |
| Phe                                                                            | ✓                                     | -                        |            |
| Ala                                                                            | ✓                                     | -                        |            |
| Tyr                                                                            | ✓                                     | -                        |            |
| Asp                                                                            | ✓                                     | +                        |            |
| Glu                                                                            | ✓                                     | +                        |            |

**Table S2:** Acquisition parameters of the NMR experiments performed on GLIC<sub>ECD</sub> at 298 K.

| Experiments <sup>a</sup>                                       | Dimension of acquired data (nucleus) |                       |                       | Spectral width (ppm) |                |                | n <sup>b</sup> |
|----------------------------------------------------------------|--------------------------------------|-----------------------|-----------------------|----------------------|----------------|----------------|----------------|
|                                                                | t <sub>1</sub>                       | t <sub>2</sub>        | t <sub>3</sub>        | F <sub>1</sub>       | F <sub>2</sub> | F <sub>3</sub> |                |
| [ <sup>1</sup> H- <sup>15</sup> N]-TROSY-HSQC                  | 192( <sup>15</sup> N)                | 1024( <sup>1</sup> H) |                       | 28.4                 | 15.5           |                | 64             |
| TROSY-HNCA                                                     | 72( <sup>13</sup> C)                 | 38( <sup>15</sup> N)  | 1024( <sup>1</sup> H) | 31.55                | 28.4           | 12.5           | 64             |
| TROSY-CBCA(CO)NH                                               | 64( <sup>13</sup> C)                 | 38( <sup>15</sup> N)  | 1024( <sup>1</sup> H) | 60.2                 | 28.4           | 12.5           | 64             |
| TROSY-CBCANH                                                   | 64( <sup>13</sup> C)                 | 38( <sup>15</sup> N)  | 1024( <sup>1</sup> H) | 60.2                 | 28.4           | 12.5           | 64             |
| TROSY-HN(CO)CA                                                 | 56( <sup>13</sup> C)                 | 38( <sup>15</sup> N)  | 1024( <sup>1</sup> H) | 28.4                 | 12.5           | 12.4           | 80             |
| HNCO                                                           | 48( <sup>13</sup> C)                 | 38( <sup>15</sup> N)  | 1024( <sup>1</sup> H) | 14.0                 | 24.3           | 12.0           | 16             |
| <sup>15</sup> N-edited [ <sup>1</sup> H- <sup>1</sup> H]-NOESY | 92( <sup>1</sup> H)                  | 38( <sup>15</sup> N)  | 1024( <sup>1</sup> H) | 12                   | 24.3           | 12.9           | 48             |
| <sup>15</sup> N R <sub>1</sub>                                 | 256( <sup>15</sup> N)                | 1024( <sup>1</sup> H) |                       | 26                   | 15             |                | 24             |
| <sup>15</sup> N R <sub>2</sub>                                 | 256( <sup>15</sup> N)                | 1024( <sup>1</sup> H) |                       | 26                   | 15             |                | 24             |
| steady-state heteronuclear NOEs                                | 256( <sup>15</sup> N)                | 1024( <sup>1</sup> H) |                       | 26                   | 15             |                | 56             |

<sup>a</sup> Data acquired on a Bruker Avance 600 MHz spectrometer equipped with a 5 mm triple resonance cryoprobe (TXI) with pulsed field gradients along the z-axis. The <sup>15</sup>N-edited NOESY was acquired with a mixing time of 100 ms.

<sup>b</sup> number of acquired scans.

All 2D and 3D spectra were collected at 298 K, processed with the Bruker software TOPSPIN and analyzed with the programs CARRA (4) and XEASY (5).

**Figure S1.** (A) 2D  $^1\text{H}$ - $^{15}\text{N}$  TROSY NMR spectrum and (B) Circular dichroism spectrum of GLIC<sub>ECD</sub> at pH 7.0, 298 K (20 mM TrisHCl). Data analysis was performed using the server DICHROWEB (<http://dichroweb.cryst.bbk.ac.uk/html/home.shtml>) (6)

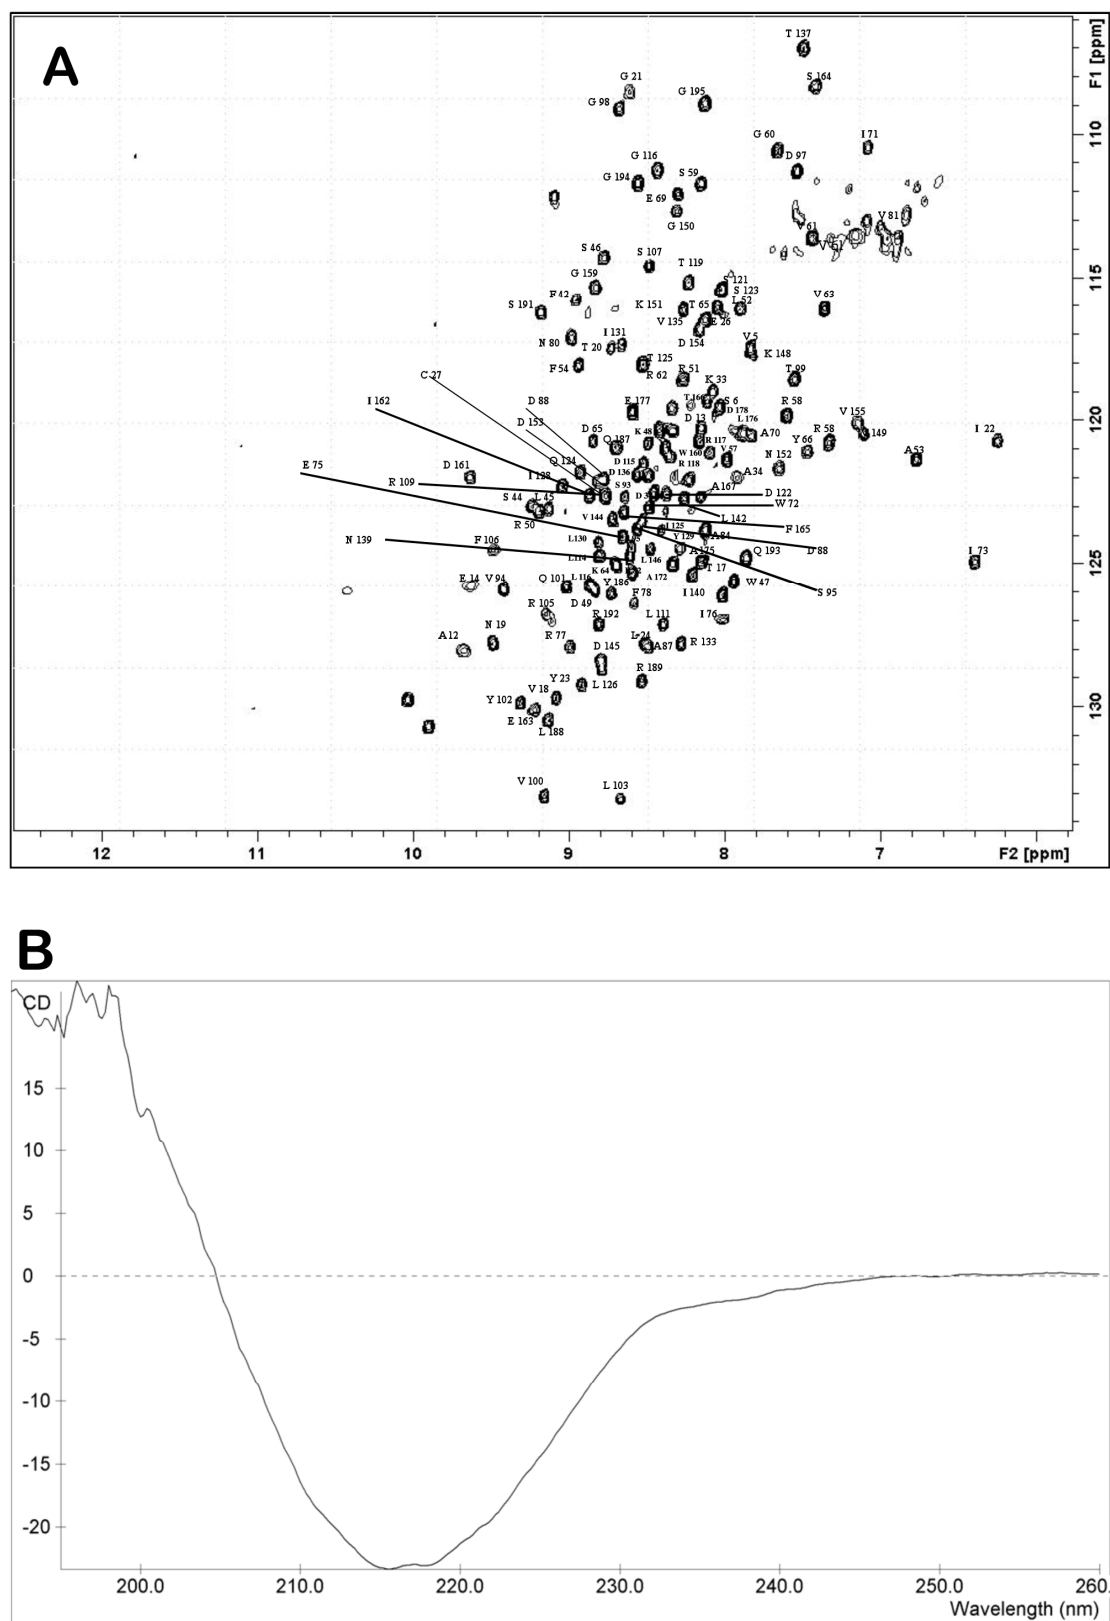

**Figure S2.** (Upper panel) Assignment status of the GLIC<sub>ECD</sub>-{Gly2His6} polypeptide at 298 K (yellow: assigned, light blue: unassigned, dark blue: Pro). The secondary structure in the crystal structure of GLIC<sub>ECD</sub> (PDB: 3IGQ) as attributed by PROCHECK (7) is shown above the sequence. (Lower panel) <sup>15</sup>N R<sub>1</sub>, R<sub>2</sub>, and heteronuclear {<sup>1</sup>H<sup>N</sup>}-<sup>15</sup>N NOE values.

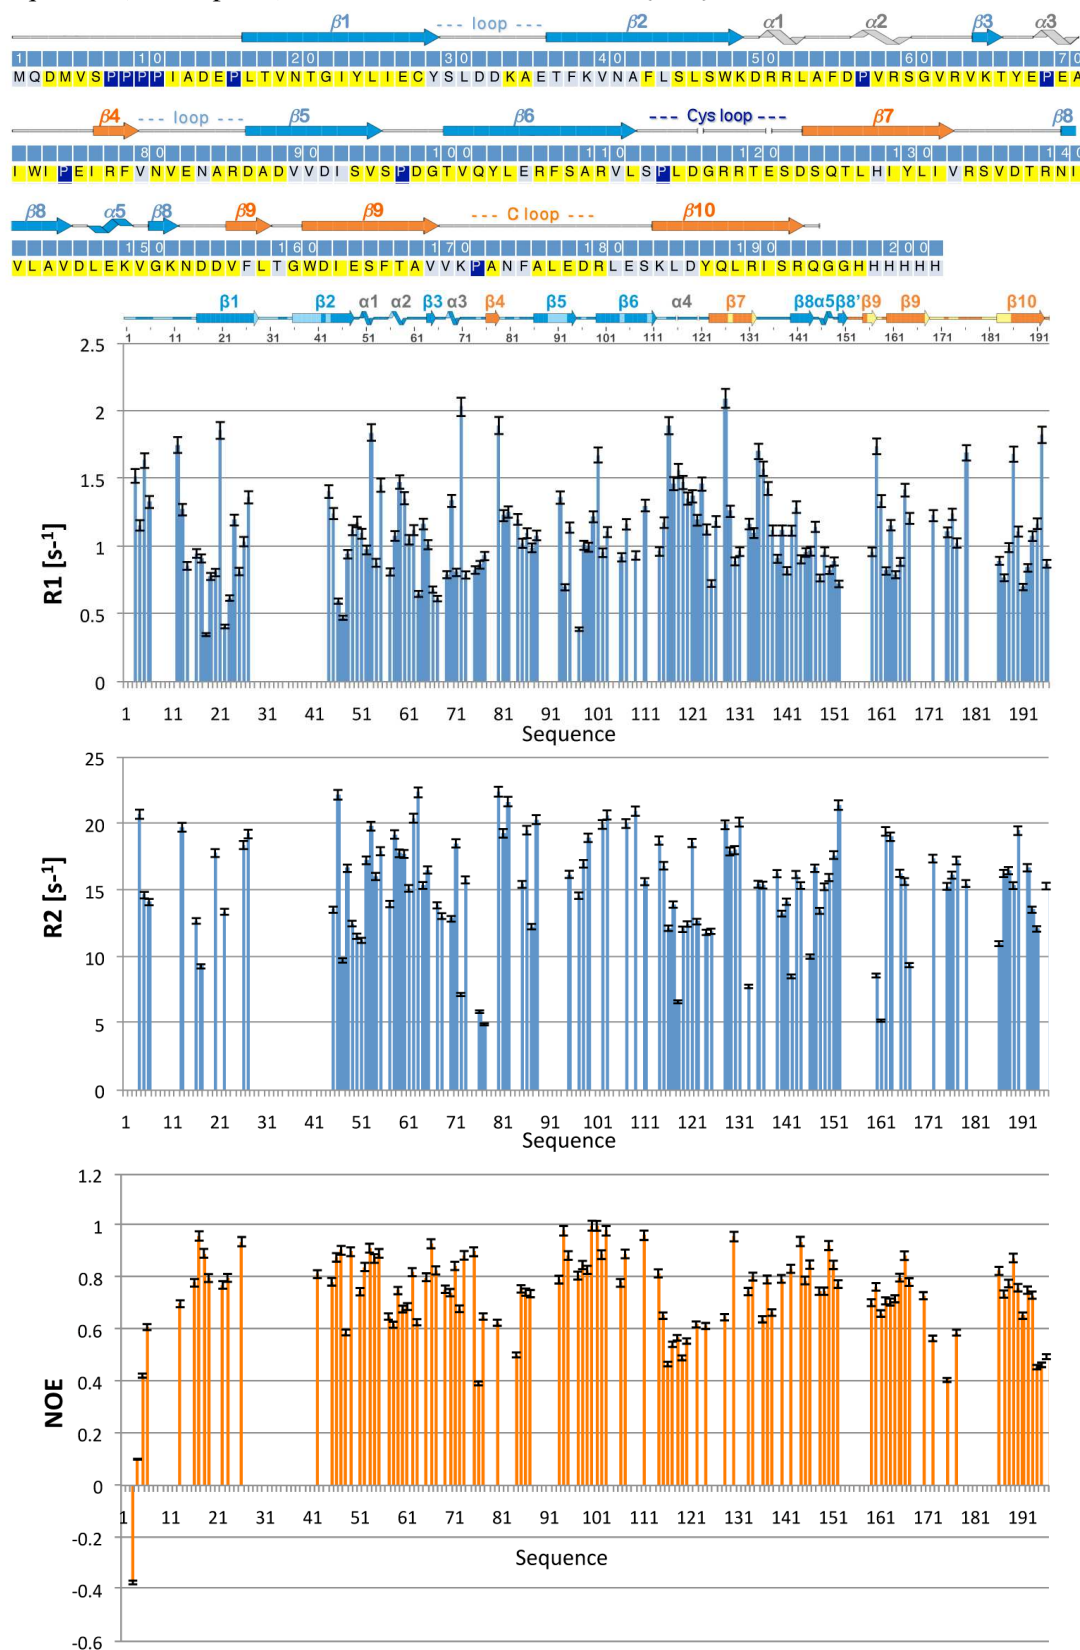

**Figure S3.** Atomic RMS fluctuations extracted from a 10 ns MD calculation of GLIC<sub>ECD</sub> (PDB: 3EAM, chain A) in water as a function of sequence. Unassigned regions of GLIC<sub>ECD</sub> are also shown for comparison. Assigned residues are indicated with “0”, unassigned ones are indicated with “1”. An ECD of the pentameric structure of full-length GLIC (3EAM) was chosen instead of a chain of the hexameric GLIC<sub>ECD</sub> structure (3IGQ), since the subunits of the latter contain undefined residues.

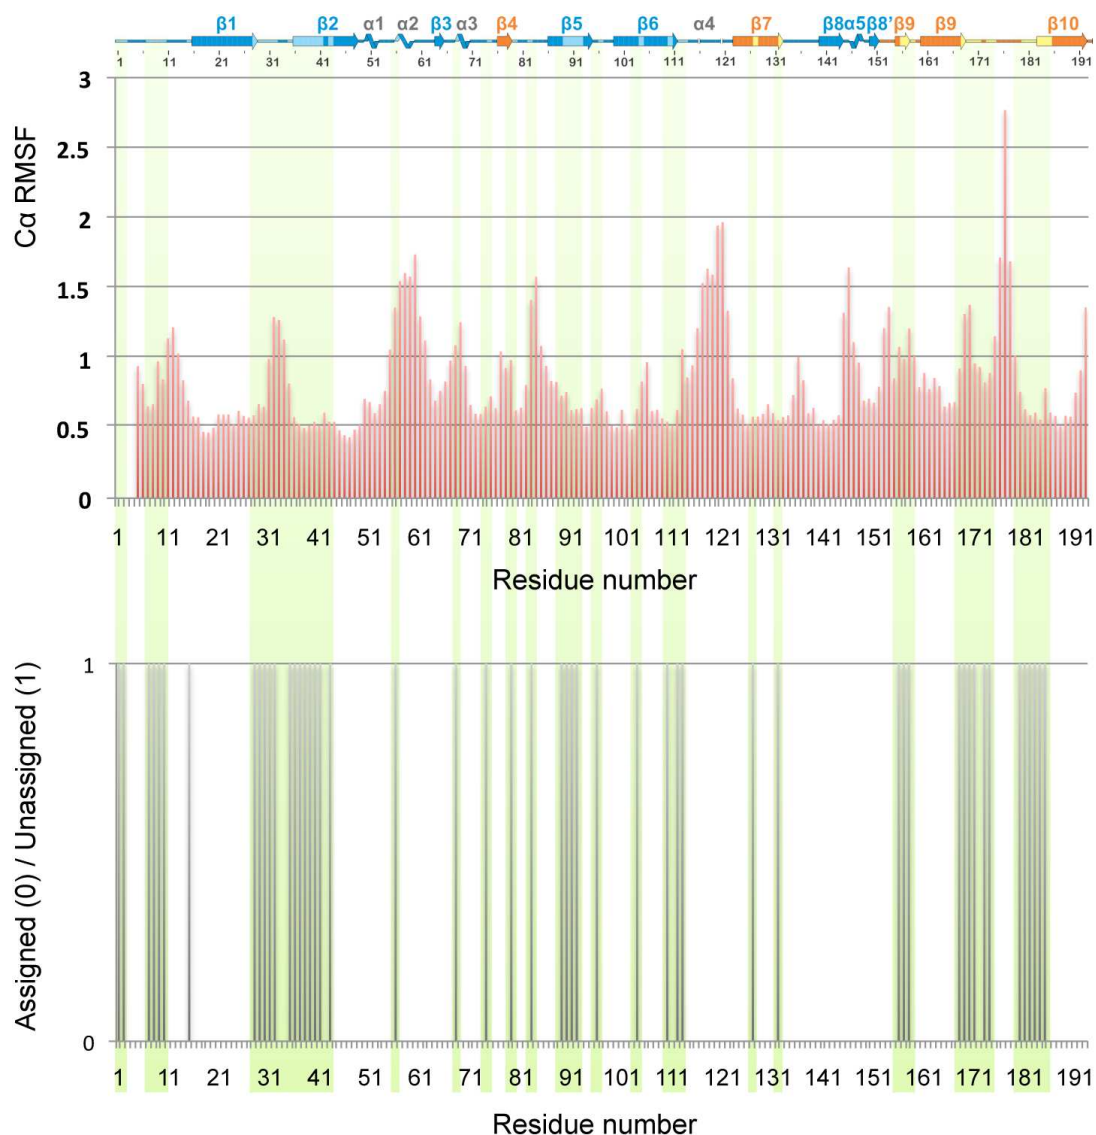

**Figure S4.** H/D exchange of GLIC<sub>ECD</sub> as a function of time monitored through  $^1\text{H}$ - $^{15}\text{N}$  HSQC NMR spectra: (A)  $^1\text{H}$ - $^{15}\text{N}$  HSQC spectrum of deuterated GLIC<sub>ECD</sub> (600 MHz; 50 mM  $\text{KPi}$ , pH 7.0, 298 K), (B)  $^1\text{H}$ - $^{15}\text{N}$  HSQC spectrum of GLIC<sub>ECD</sub> after 90 min of H/D exchange, (C)  $^1\text{H}$ - $^{15}\text{N}$  HSQC spectrum of GLIC<sub>ECD</sub> after 23 h of H/D exchange, and (D)  $^1\text{H}$ - $^{15}\text{N}$  HSQC spectrum of GLIC<sub>ECD</sub> after 6d 20h of H/D exchange

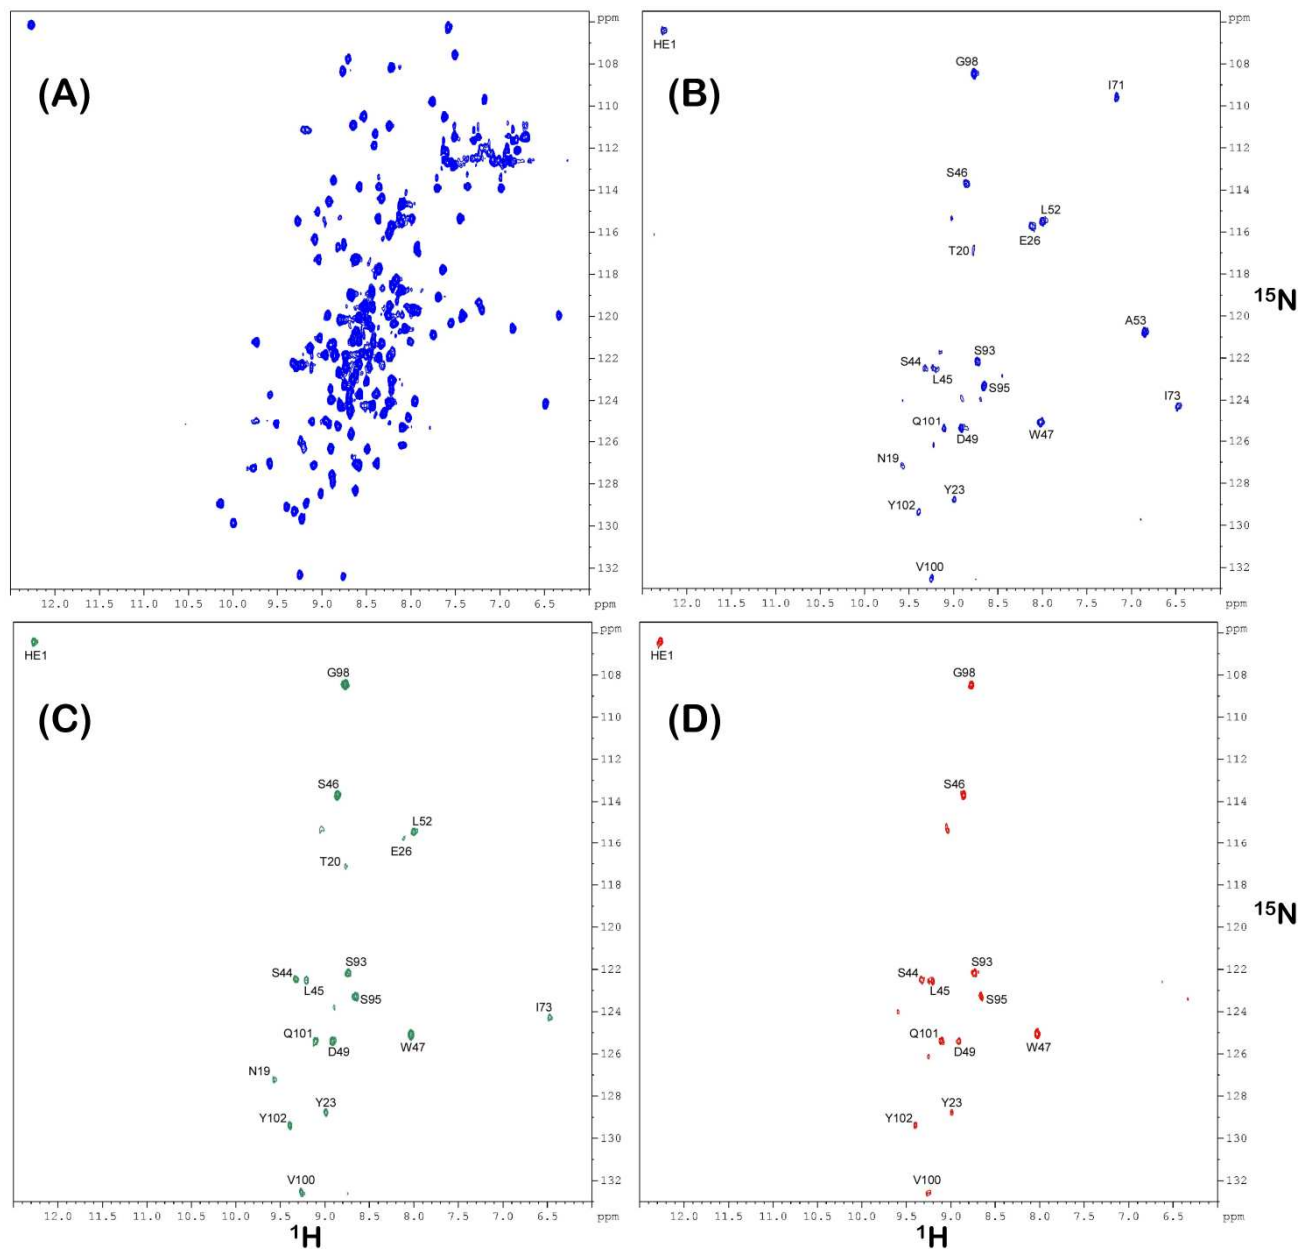



**Figure S5.** *Ab initio* normal mode analysis of GLIC ECD<sub>5-193</sub> (PDB: 3EAM, chain A) as a function of sequence through the web interface of *The Elastic Network Model* (<http://www.igs.cnrs-mrs.fr/elnetmo/>)(8). The *ElNémo* server considers the first 6 modes to represent the translational and rotational motions of the system and calculates the next 5 modes. These modes are presented here, and numbered from 1 to 5. Unassigned regions of GLIC<sub>ECD</sub> are also shown for comparison. Assigned residues are indicated with “0”, unassigned ones are indicated with “1”. An ECD of the pentameric structure of full-length GLIC (3EAM) was chosen instead of a chain of the hexameric GLIC<sub>ECD</sub> structure (3IGQ), since the subunits of the latter contain undefined residues.

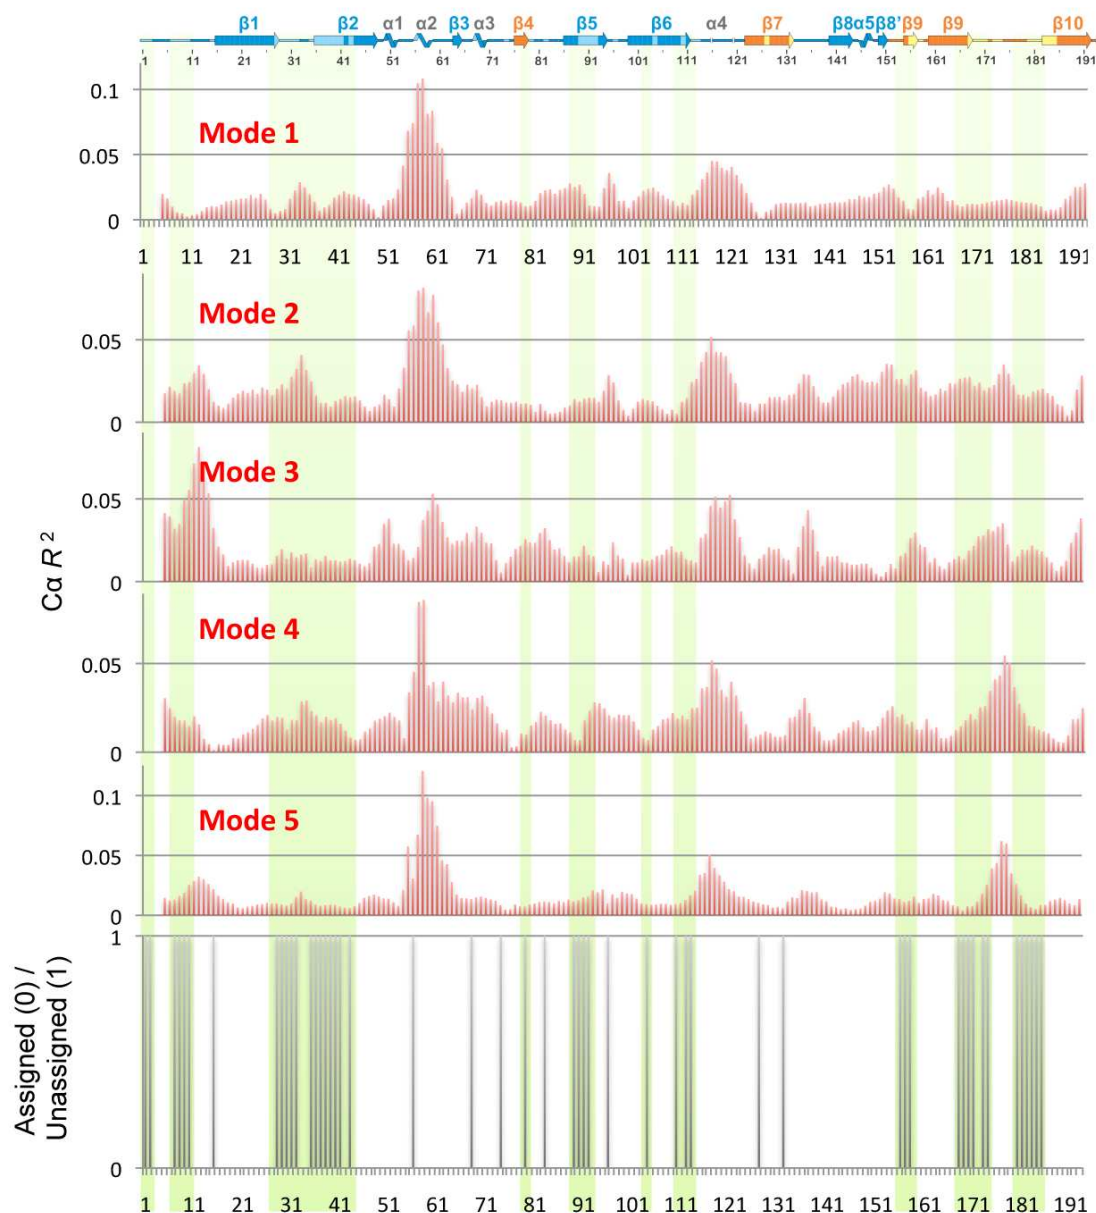

## REFERENCES

1. Nury, H.; Bocquet, N.; Le Poupon, C.; Raynal, B.; Haouz, A.; Corringier, P. J.; Delarue, M. *J. Mol. Biol.* **2010**, *395*, 1114-1127.
2. Farrow, N.A., Muhandiram, R., Singer, A.U., Pascal, S.M., Kay, C.M., Gish, G., Shoelson, S.E., Pawson, T., Forman-Kay, J.D. and Kay, L.E. *Biochemistry* **1994**, *33*, 5984–6003.
3. Grzesiek, S. and Bax, A. *J. Am. Chem. Soc.* **1993**, *115*, 12593–12594.
4. Keller, R. **2004**, Cantina Verlag, CH-6410 Goldau.
5. Bartels, C.; Xia, T.-H.; Billeter, M.; Güntert, P.; Wüthrich, K. *J. Biomol. NMR* **1995**, *5*, 1-10.
6. L. Whitmore, and B.A Wallace, *Nucleic Acids Research* **2004**, *32*:W668-673
7. Laskowski, R.A.; MacArthur, M.W.; Moss, D.S.; Thornton, J.M. *J. Appl. Crystallogr.* **1993**, *26*, 283–291.
8. V Alexandrov, U Lehnert, N Echols, D Milburn, D Engelman, M Gerstein *Protein Sci* **2005**, *14*, 633-643. (<http://molmovdb.mbb.yale.edu/molmovdb/nma/>)
